# Supplementary material for: Endangered island endemic plants have vulnerable genomes
Source: PubMed Central journal article supplement (PMC6597543; doi:10.1038/s42003-019-0490-7), 2019-06-27
Supplement: 42003_2019_490_MOESM1_ESM.pdf [file 42003_2019_490_MOESM1_ESM.pdf]

Supplementary Table 2. *P*-values of t-test compared the mean values of the number of synonymous SNVs at non-duplicated transcripts with heterozygous loci (the counts per kb), the proportion of non-synonymous SNVs to total SNVs on non-duplicated transcripts with heterozygous loci, the proportion of nonsense SNVs to total non-synonymous SNVs on non-duplicated transcripts with heterozygous loci, and the proportion of deleterious variations in non-synonymous SNVs on non-duplicated transcripts with heterozygous loci estimated by PROVEAN and SIFT between endangered island endemic [EIE] and non-endangered [NE] species.

| <i>A. boninsimae</i> [EIE]                                |                |              |
|-----------------------------------------------------------|----------------|--------------|
| <i>A. pygmaea</i> [NE]                                    |                |              |
| Synonymous SNV                                            | 0.511          |              |
| Nonsyn/Syn SNV                                            | 0.396          |              |
| Loss of function                                          | 0.315          |              |
| PROVEAN                                                   | <b>0.018</b>   |              |
| SIFT                                                      | 0.447          |              |
| <i>A. shikotanensis</i> [NE]                              |                |              |
| Synonymous SNV                                            | < <b>0.001</b> |              |
| Nonsyn/Syn SNV                                            | < <b>0.001</b> |              |
| Loss of function                                          | <b>0.002</b>   |              |
| PROVEAN                                                   | < <b>0.001</b> |              |
| SIFT                                                      | <b>0.005</b>   |              |
| <i>C. grandicollum</i> [EIE] <i>C. linguifolium</i> [EIE] |                |              |
| <i>C. lanceolatum</i> [NE]                                |                |              |
| Synonymous SNV                                            | 0.580          | 0.261        |
| Nonsyn/Syn SNV                                            | <b>0.003</b>   | 0.054        |
| Loss of function                                          | 0.064          | 0.092        |
| PROVEAN                                                   | <b>0.003</b>   | <b>0.008</b> |
| SIFT                                                      | 0.065          | 0.051        |
| <i>C. hoshii</i> [EIE]                                    |                |              |
| <i>C. triplicata</i> [NE]                                 |                |              |
| Synonymous SNV                                            | <b>0.010</b>   |              |
| Nonsyn/Syn SNV                                            | <b>0.006</b>   |              |
| Loss of function                                          | 0.431          |              |
| PROVEAN                                                   | < <b>0.001</b> |              |
| SIFT                                                      | <b>0.010</b>   |              |
| <i>M. tetramerum</i> [EIE]                                |                |              |
| <i>M. candidum</i> [NE]                                   |                |              |
| Synonymous SNV                                            | <b>0.005</b>   |              |
| Nonsyn/Syn SNV                                            | <b>0.015</b>   |              |
| Loss of function                                          | <b>0.030</b>   |              |
| PROVEAN                                                   | < <b>0.001</b> |              |
| SIFT                                                      | <b>0.003</b>   |              |
